# Supplementary material for: A promiscuous glutathione transferase transformed into a selective thiolester hydrolase
Source: Royal Society of Chemistry journal article supplement (doi:10.1039/b510115h), 2005-12-01
Supplement: b510115h.pdf [file b510115h.pdf]

## Supporting information

A promiscuous glutathione transferase transformed into a selective thiolester hydrolase

Sofia Hederos, Lotta Tegler, Jonas Carlsson, Bengt Persson, Johan Viljanen and Kerstin S. Broo

The stability of A216H as measured by the specific activity ( $\mu\text{mol}\cdot\text{min}^{-1}\cdot\text{mg}^{-1}$ ) towards CDNB.

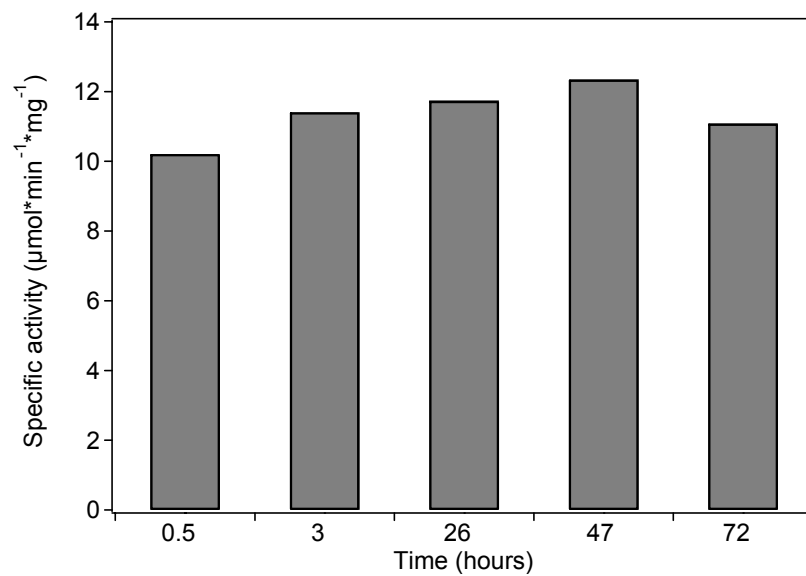

Acetonitrile gradients used for the experiments analyzed by HPLC.

The GS-thiolesters in experiment A to D (with exceptions listed below) were analyzed by the following gradient:

0-2 min: 10% ACN 0.1%TFA, flow = 1 mL/min  
2-30 min: 10→66% ACN 0.1%TFA, flow = 1 mL/min  
30-31 min: 66→90% ACN 0.1%TFA, flow = 1 mL/min  
31-35 min: 90% ACN 0.1%TFA, flow = 3 mL/min  
35-35,5 min: 90→10% ACN 0.1%TFA, flow = 3 mL/min  
35,5-41 min: 10% ACN 0.1%TFA, flow = 2 mL/min  
41-45 min: 10% ACN 0.1%TFA, flow = 1 mL/min

GS-2 in experiment B, C, D and in the saturation kinetic experiment as well as GS-8 in experiment B and GS-12 in experiment C were analyzed by following gradient:

0-2 min: 10% ACN 0.1%TFA, flow = 1 mL/min  
2-60 min: 10→66% ACN 0.1%TFA, flow = 1 mL/min  
60-61 min: 66→90% ACN 0.1%TFA, flow = 1 mL/min  
61-65 min: 90% ACN 0.1%TFA, flow = 3 mL/min  
65-65,5 min: 90→10% ACN 0.1%TFA, flow = 3 mL/min  
65,5-71 min: 10% ACN 0.1%TFA, flow = 2 mL/min  
71-75 min: 10% ACN 0.1%TFA, flow = 1 mL/min

The concentration of GS-2 as a function of time when incubated with A216H. The data is derived from HPLC analysis using relative responses.

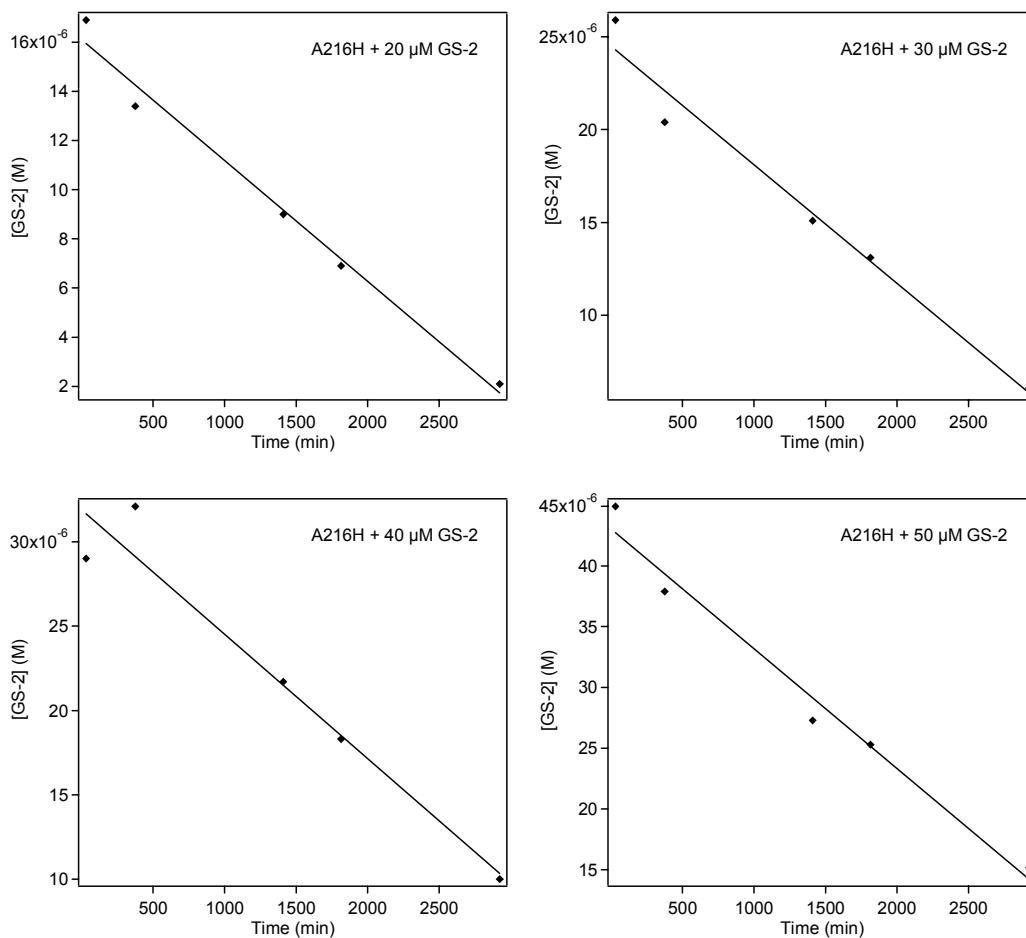

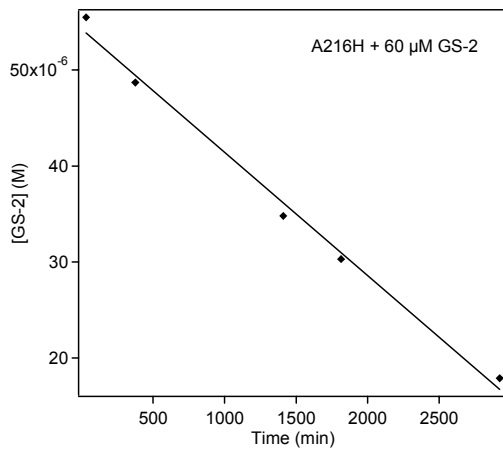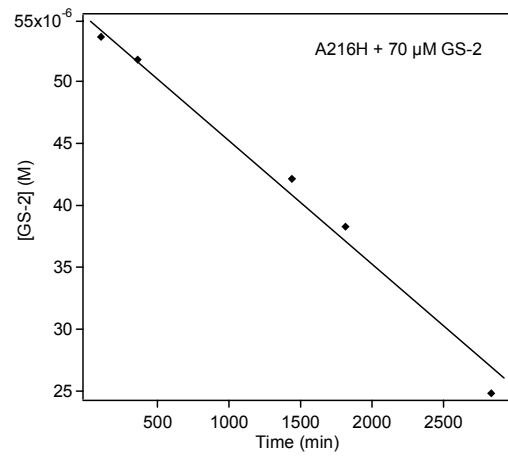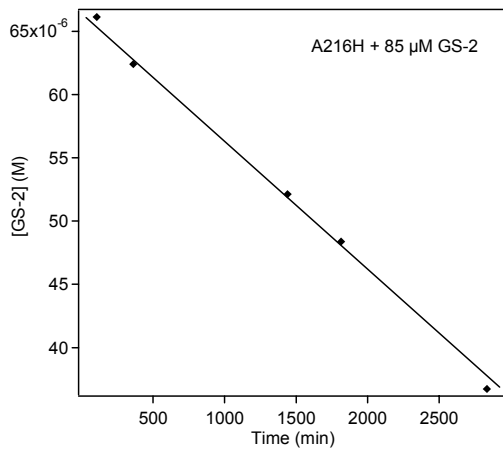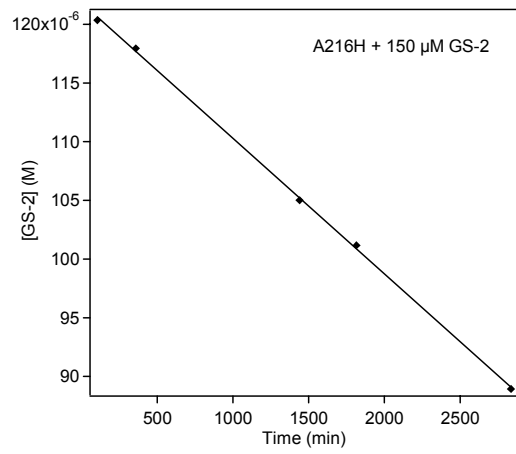

| <i>Table. Saturation kinetics of A216H-catalyzed hydrolysis of GS-2.</i> |                   |      |      |      |      |      |
|--------------------------------------------------------------------------|-------------------|------|------|------|------|------|
| [GS-2]<br>[ $\mu\text{M}$ ]                                              | Time points [min] |      |      |      |      |      |
| 4.4                                                                      | 155               | 345  | 1950 | 3165 |      |      |
| 10                                                                       | 14                | 1357 | 1925 | 3071 |      |      |
| 20                                                                       | 30                | 375  | 1410 | 1815 | 2925 |      |
| 22                                                                       | 155               | 345  | 1950 | 3165 |      |      |
| 30                                                                       | 14                | 1357 | 1925 | 3071 |      |      |
| 30                                                                       | 30                | 375  | 1410 | 1815 | 2925 |      |
| 35                                                                       | 20                | 150  | 480  | 1260 | 1640 | 3440 |
| 40                                                                       | 14                | 1357 | 1925 | 3071 |      |      |
| 40                                                                       | 30                | 375  | 1410 | 1815 | 2925 |      |
| 45                                                                       | 30                | 375  | 1410 | 1815 | 2925 |      |
| 50                                                                       | 14                | 1357 | 1925 | 3071 |      |      |
| 50                                                                       | 30                | 375  | 1410 | 1815 | 2925 |      |
| 55                                                                       | 30                | 375  | 1410 | 1815 | 2925 |      |
| 58                                                                       | 105               | 360  | 1440 | 1815 | 2835 |      |
| 60                                                                       | 30                | 375  | 1410 | 1815 | 2925 |      |
| 60                                                                       | 105               | 360  | 1440 | 1815 | 2835 |      |
| 65                                                                       | 105               | 360  | 1440 | 1815 | 2835 |      |
| 70                                                                       | 105               | 360  | 1440 | 1815 | 2835 |      |
| 75                                                                       | 105               | 360  | 1440 | 1815 | 2835 |      |
| 80                                                                       | 105               | 360  | 1440 | 1815 | 2835 |      |
| 85                                                                       | 105               | 360  | 1440 | 1815 | 2835 |      |
| 150                                                                      | 105               | 360  | 1440 | 1815 | 2835 |      |
| 175                                                                      | 14                | 1357 | 1925 | 3071 |      |      |
